# Supplementary material for: Elucidation of Motifs in Ribosomal Protein S9 That Mediate Its Nucleolar Localization and Binding to NPM1/Nucleophosmin
Source: PubMed Central journal article supplement (PMC3527548; doi:10.1371/journal.pone.0052476), 2012-12-20
Supplement: pone.0052476.s005.pdf [file pone.0052476.s005.pdf]

**Supplementary Table S1.** Prediction of nuclear (NLS) and nucleolar localization signals (NoLS) in small subunit ribosomal proteins. The percentage % of basic residues is also indicated. Prediction of NLS was made with PSORT II and prediction of NoLS using NoD.

| <b>RP</b> | <b>NLS score</b> | <b>NLS</b> | <b>basic residues (%)</b> | <b>NoLS</b> |
|-----------|------------------|------------|---------------------------|-------------|
| RPS2      | -0,47            | 0          | 16,4                      | 0           |
| RPS3      | -0,16            | 1          | 15,6                      | 0           |
| RPS3A     | 0,27             | 2          | 19,7                      | 1           |
| RPS4X     | -0,47            | 0          | 18,6                      | 0           |
| RPS4Y     | -0,47            | 0          | 18,6                      | 0           |
| RPS5      | -0,47            | 0          | 16,2                      | 0           |
| RPS6      | 2,6              | 7          | 27,3                      | 2           |
| RPS7      | 0,12             | 2          | 19,6                      | 1           |
| RPS8      | 5,79             | 13         | 26,6                      | 1           |
| RPS9      | 1,81             | 3          | 23,7                      | 1           |
| RPS10     | -0,04            | 1          | 18,8                      | 0           |
| RPS11     | 1,16             | 2          | 22,2                      | 0           |
| RPS12     | -0,22            | 1          | 15,9                      | 0           |
| RPS13     | 0,97             | 1          | 21,2                      | 0           |
| RPS14     | -0,04            | 1          | 17,9                      | 0           |
| RPS15     | 1,28             | 2          | 21,4                      | 2           |
| RPS15A    | -0,29            | 1          | 16,9                      | 0           |
| RPS16     | 0,48             | 0          | 20,5                      | 0           |
| RPS17     | 0,36             | 2          | 19,3                      | 0           |
| RPS18     | 0,48             | 0          | 23,7                      | 0           |
| RPS19     | -0,47            | 0          | 18,6                      | 0           |
| RPS20     | -0,47            | 0          | 19,3                      | 0           |
| RPS21     | -0,47            | 0          | 14,8                      | 0           |
| RPS23     | 0,48             | 0          | 22,4                      | 1           |
| RPS24     | 1,71             | 2          | 27,1                      | 1           |
| RPS25     | 2,02             | 4          | 26,4                      | 1           |
| RPS26     | 0,79             | 1          | 25,2                      | 2           |
| RPS27     | 0,85             | 6          | 17,9                      | 1           |
| RPS27A    | 5,5              | 12         | 22,4                      | 1           |
| RPS28     | 0,48             | 0          | 20,3                      | 0           |
| RPS29     | -0,47            | 0          | 19,6                      | 0           |
| RPS30     | 0,41             | 3          | 17,3                      | 1           |
